# Supplementary material for: Epigenetic memory independent of symmetric histone inheritance
Source: eLife journal article supplement (doi:10.7554/elife.51421), 2019-10-15
Supplement: supp [file elife-51421-supp-v1.zip]

Archive with 17 entries (17 files):
- elife_poa_e51421_Figure_2_figure_supplement_3.pdf
- elife_poa_e51421_Figure_1_figure_supplement_2.pdf
- elife_poa_e51421_Supplementary_file_1.xlsx
- elife_poa_e51421_Figure_5_figure_supplement_1.pdf
- elife_poa_e51421_Figure_1_figure_supplement_3.pdf
- elife_poa_e51421_Figure_1_figure_supplement_1.pdf
- elife_poa_e51421_Figure_4_figure_supplement_3.pdf
- elife_poa_e51421_Figure_2_figure_supplement_1.pdf
- elife_poa_e51421_Figure_1_figure_supplement_5.pdf
- elife_poa_e51421_Video_1.avi
- elife_poa_e51421_Figure_4_figure_supplement_2.pdf
- elife_poa_e51421_Figure_1_figure_supplement_4.pdf
- elife_poa_e51421_Figure_2_figure_supplement_2.pdf
- elife_poa_e51421_Figure_2_figure_supplement_4.pdf
- elife_poa_e51421_Supplementary_file_2.xlsx
- elife_poa_e51421_Figure_4_figure_supplement_1.pdf
- elife_poa_e51421_Transparent_Reporting_File.pdf
