# Supplementary material for: Epigenetic memory independent of symmetric histone inheritance
Source: eLife journal article supplement (doi:10.7554/elife.51421), 2019-10-15
Supplement: supp [file elife-51421-supp-v1.zip › elife_poa_e51421_Supplementary_file_1.xlsx]

## Sheet: Sheet1
Strain	Genotype
JRY11471	ADE2, lys2, TRP1, hml∆, mat∆::NatMX, HMRα, hmrα2∆::CRE (N14), ura3∆::loxP:yEmRFP:tCYC1:KanMX:loxP:yEGFP:tADH1, can1-100, his3-11,15, leu2-3,112
JRY11538	ADE2, lys2, TRP1, hml∆, mat∆::NatMX, HMRα, hmrα2∆::CRE (N12), ura3∆::loxP:yEmRFP:tCYC1:KanMX:loxP:yEGFP:tADH1, can1-100, his3-11,15, leu2-3,112
JRY11788	ADE2, lys2, TRP1, hml∆, mat∆::NatMX, HMRα, hmrα2∆::CRE (N10), ura3∆::loxP:yEmRFP:tCYC1:KanMX:loxP:yEGFP:tADH1, can1-100, his3-11,15, leu2-3,112
JRY11536	ADE2, lys2, TRP1, hml∆, mat∆::NatMX, HMRα, hmrα2∆::CRE (N9), ura3∆::loxP:yEmRFP:tCYC1:KanMX:loxP:yEGFP:tADH1, can1-100, his3-11,15, leu2-3,112
JRY11540	ADE2, lys2, TRP1, hml∆, mat∆::NatMX, HMRα, hmrα2∆::CRE (N7), ura3∆::loxP:yEmRFP:tCYC1:KanMX:loxP:yEGFP:tADH1, can1-100, his3-11,15, leu2-3,112
JRY11259	ADE2, lys2, TRP1, hmlα2∆::Cre (N22), mat∆::NatMX, hmr∆::K.lac Leu2, ura3∆::loxP:yEmRFP:tCYC1:HygMX:loxP:yEGFP:tADH1, can1-100, his3-11,15, leu2-3,112
JRY11277	ADE2, lys2, TRP1, hmlα2∆::Cre (N19a), mat∆::NatMX, hmr∆::K.lac Leu2, ura3∆::loxP:yEmRFP:tCYC1:HygMX:loxP:yEGFP:tADH1, can1-100, his3-11,15, leu2-3,112
JRY11279	ADE2, lys2, TRP1, hmlα2∆::Cre (N19b), mat∆::NatMX, hmr∆::K.lac Leu2, ura3∆::loxP:yEmRFP:tCYC1:HygMX:loxP:yEGFP:tADH1, can1-100, his3-11,15, leu2-3,112
JRY11278	ADE2, lys2, TRP1, hmlα2∆::Cre (N16a), mat∆::NatMX, hmr∆::K.lac Leu2, ura3∆::loxP:yEmRFP:tCYC1:HygMX:loxP:yEGFP:tADH1, can1-100, his3-11,15, leu2-3,112
JRY11282	ADE2, lys2, TRP1, hmlα2∆::Cre (N16b), mat∆::NatMX, hmr∆::K.lac Leu2, ura3∆::loxP:yEmRFP:tCYC1:HygMX:loxP:yEGFP:tADH1, can1-100, his3-11,15, leu2-3,112
JRY11280	ADE2, lys2, TRP1, hmlα2∆::Cre (N16c), mat∆::NatMX, hmr∆::K.lac Leu2, ura3∆::loxP:yEmRFP:tCYC1:HygMX:loxP:yEGFP:tADH1, can1-100, his3-11,15, leu2-3,112
JRY11288	ADE2, lys2, TRP1, hmlα2∆::Cre (N13a), mat∆::NatMX, hmr∆::K.lac Leu2, ura3∆::loxP:yEmRFP:tCYC1:HygMX:loxP:yEGFP:tADH1, can1-100, his3-11,15, leu2-3,112
JRY11284	ADE2, lys2, TRP1, hmlα2∆::Cre (N13b), mat∆::NatMX, hmr∆::K.lac Leu2, ura3∆::loxP:yEmRFP:tCYC1:HygMX:loxP:yEGFP:tADH1, can1-100, his3-11,15, leu2-3,112
JRY11281	ADE2, lys2, TRP1, hmlα2∆::Cre (N13c), mat∆::NatMX, hmr∆::K.lac Leu2, ura3∆::loxP:yEmRFP:tCYC1:HygMX:loxP:yEGFP:tADH1, can1-100, his3-11,15, leu2-3,112
JRY11290	ADE2, lys2, TRP1, hmlα2∆::Cre (N10a), mat∆::NatMX, hmr∆::K.lac Leu2, ura3∆::loxP:yEmRFP:tCYC1:HygMX:loxP:yEGFP:tADH1, can1-100, his3-11,15, leu2-3,112
JRY11286	ADE2, lys2, TRP1, hmlα2∆::Cre (N10b), mat∆::NatMX, hmr∆::K.lac Leu2, ura3∆::loxP:yEmRFP:tCYC1:HygMX:loxP:yEGFP:tADH1, can1-100, his3-11,15, leu2-3,112
JRY11292	ADE2, lys2, TRP1, hmlα2∆::Cre (N7), mat∆::NatMX, hmr∆::K.lac Leu2, ura3∆::loxP:yEmRFP:tCYC1:HygMX:loxP:yEGFP:tADH1, can1-100, his3-11,15, leu2-3,112
JRY11474	ADE2, lys2, hml∆::NatMX, mat∆::KanMX, HMRα, hmrα2∆::yEGFP, can1-100, his3-11,15, leu2-3,112, trp1-1, ura3-1
JRY11478	ADE2, lys2, sir1∆::LEU2, hml∆::NatMX, mat∆::KanMX, HMRα, hmrα2∆::yEGFP (sN12), can1-100, his3-11,15, leu2-3,112, trp1-1, ura3-1
JRY11496	ADE2, lys2, sir4∆::HIS3 hml∆::NatMX, mat∆::KanMX, HMRα, hmrα2∆::yEGFP, can1-100, his3-11,15, leu2-3,112, trp1-1, ura3-1
JRY11472	ADE2, lys2, hmlα2∆::yEmRFP, mat∆::KanMX, hmr∆::HygMX, can1-100, his3-11,15, leu2-3,112, trp1-1, ura3-1
JRY11476	ADE2, lys2, sir1∆::LEU2, hmlα2∆::yEmRFP, mat∆::KanMX, hmr∆::HygMX, can1-100, his3-11,15, leu2-3,112, trp1-1, ura3-1
JRY11494	ADE2, lys2, sir4∆::HIS3 hmlα2∆::yEmRFP, mat∆::KanMX, hmr∆::HygMX, can1-100, his3-11,15, leu2-3,112, trp1-1, ura3-1
JRY11545	ADE2, lys2, sir1∆::LEU2, hml∆::NatMX, mat∆::KanMX, HMRα, hmrα2∆::yEGFP (sN10), can1-100, his3-11,15, leu2-3,112, trp1-1, ura3-1
JRY11568	ADE2, lys2, sir1∆::LEU2, hml∆::NatMX, mat∆::KanMX, HMRα, hmrα2∆::yEGFP (sN8), can1-100, his3-11,15, leu2-3,112, trp1-1, ura3-1
JRY11569	ADE2, lys2, sir1∆::LEU2, hml∆::NatMX, mat∆::KanMX, HMRα, hmrα2∆::yEGFP (sN6), can1-100, his3-11,15, leu2-3,112, trp1-1, ura3-1
JRY11562	ADE2, lys2, dpb3∆, TRP1, hml∆, mat∆::NatMX, HMRα, hmrα2∆::CRE, ura3∆::loxP:yEmRFP:tCYC1:KanMX:loxP:yEGFP:tADH1, can1-100, his3-11,15, leu2-3,112
JRY11591	ADE2, lys2, mcm2-3A, TRP1, hml∆, mat∆::NatMX, HMRα, hmrα2∆::CRE, ura3∆::loxP:yEmRFP:tCYC1:KanMX:loxP:yEGFP:tADH1, can1-100, his3-11,15, leu2-3,112
JRY11592	ADE2, lys2, dpb3∆, mcm2-3A, TRP1, hml∆, mat∆::NatMX, HMRα, hmrα2∆::CRE, ura3∆::loxP:yEmRFP:tCYC1:KanMX:loxP:yEGFP:tADH1, can1-100, his3-11,15, leu2-3,112
JRY11550	ADE2, lys2, sir1∆::LEU2, dpb3∆, hml∆::NatMX, mat∆::KanMX, HMRα, hmrα2∆::yEGFP, can1-100, his3-11,15, leu2-3,112, trp1-1, ura3-1
JRY11589	ADE2, lys2, sir1∆::LEU2, mcm2-3A, hml∆::NatMX, mat∆::KanMX, HMRα, hmrα2∆::yEGFP, can1-100, his3-11,15, leu2-3,112, trp1-1, ura3-1
JRY11590	ADE2, lys2, sir1∆::LEU2, dpb3∆, mcm2-3A, hml∆::NatMX, mat∆::KanMX, HMRα, hmrα2∆::yEGFP, can1-100, his3-11,15, leu2-3,112, trp1-1, ura3-1
JRY11554	ADE2, lys2, sir1∆::LEU2, dpb3∆, hml∆::NatMX, mat∆::KanMX, HMRα, hmrα2∆::yEGFP (sN10), can1-100, his3-11,15, leu2-3,112, trp1-1, ura3-1
JRY11570	ADE2, lys2, sir1∆::LEU2, dpb3∆, hml∆::NatMX, mat∆::KanMX, HMRα, hmrα2∆::yEGFP (sN8), can1-100, his3-11,15, leu2-3,112, trp1-1, ura3-1
JRY11571	ADE2, lys2, sir1∆::LEU2, dpb3∆, hml∆::NatMX, mat∆::KanMX, HMRα, hmrα2∆::yEGFP (sN6), can1-100, his3-11,15, leu2-3,112, trp1-1, ura3-1
JRY11776	ADE2, lys2, sir1∆::LEU2, dpb3∆, mcm2-3A, hml∆::NatMX, mat∆::KanMX, HMRα, hmrα2∆::yEGFP (sN10), can1-100, his3-11,15, leu2-3,112, trp1-1, ura3-1
JRY11774	ADE2, lys2, sir1∆::LEU2, dpb3∆, mcm2-3A, hml∆::NatMX, mat∆::KanMX, HMRα, hmrα2∆::yEGFP (sN8), can1-100, his3-11,15, leu2-3,112, trp1-1, ura3-1
JRY11779	ADE2, lys2, sir1∆::LEU2, dpb3∆, mcm2-3A, hml∆::NatMX, mat∆::KanMX, HMRα, hmrα2∆::yEGFP (sN6), can1-100, his3-11,15, leu2-3,112, trp1-1, ura3-1
unless otherwise indicated, any HMRα, hmrα2∆::CRE strain is "N14" and any HMRα, hmrα2∆::GFP is "sN12"
