# Supplementary material for: Epigenetic memory independent of symmetric histone inheritance
Source: eLife journal article supplement (doi:10.7554/elife.51421), 2019-10-15
Supplement: supp [file elife-51421-supp-v1.zip › elife_poa_e51421_Supplementary_file_2.xlsx]

## Sheet: Sheet1
Construct BURN assay strains
oAD3	hmlα2Δ::yEmRFP for	TAGAAGTGGGCAAGAAAAAAAGGAAGATAAGCAAGAAAAAATGGTTTCAAAAGGTGAAGA
oAD7	hmlα2Δ::yEmRFP rev	ATATATTCTACACAGATATATACATATTTGTTTTTCGGGCTTATTTATATAATTCATCCA
oAD35	hmlα2Δ::yEGFP fragment fwd	ATATATTCTACACAGATATATACATATTTGTTTTTCGGGCTTATTTGTACAATTCATCCA
oAD88	hmlα2Δ::yEGFP fragment rev	TAAACAATAGCAATTGTATAAACACATAGAAATATGAGTATATAAACAAACATTGGGAAC
Delete HMR-E-proximal nucleosomes
oDS552	HMR-E-proximal sgRNA	AAACCGCCTACCTTCTTGAACAAGAA
oDS539	N14 to N12 deletion for	ACATCATAAAATACGAACGATCCCCGTCCAAGTTATGAGCAAATATATAT
oDS540	N14 to N12 deletion rev	TATGTATATATCTGTGTAGAATATATATATATATATATTTGCTCATAACT
Delete HMR-I-proximal nucleosomes
oDS81	HMR-I-proximal sgRNA	AAACTTCTTCAGCGAGCAGAGAAGAA
oDS728	N14 to N10 deletion fwd	ATTCACAATATGTTTACTTCGAAGCCTGCTTTCAAAATTATTACATGTCA
oDS729	N14 to N10 deletion fwd	AAATTATATCGCCATATACGAAAATGTTGGTGACATGTAATAATTTTGAA
oDS541	N14 to N9 deletion fwd	TTTTATGTTTCAAAACATTAATGATGTCTGGGTTTTGTTTTTACATGTCA
oDS542	N14 to N9 deletion fwd	AAATTATATCGCCATATACGAAAATGTTGGTGACATGTAAAAACAAAACC
Delete HML-E-proximal nucleosomes
oDS59	HML-E-proximal sgRNA	AAACGAAATCGATAATAATGGCCAAA
oDS96	N22 to N19a deletion fwd	CGGCACGGACTTATTTGGAATTCAAATTATTAATGAAAGACAATTCCTGA
oDS97	N22 to N19a deletion rev	ACCCTTCGTAAACTCAATCCAACATGCAACTCAGGAATTGTCTTTCATTA
oDS98	N22 to N16a deletion fwd	CGGCACGGACTTATTTGGAATTCAAATTATTAATGAAAGAAAATATATAT
oDS99	N22 to N16a deletion rev	TATGTATATATCTGTGTAGAATATATATATATATATATTTTCTTTCATTA
Delete HML-I-proximal nucleosomes
oDS93	HML-I-proximal sgRNA	AAACTGAGAGTTAGTTACTCAGCTAA
oDS100	N22 to N19b deletion fwd	ATTTACCAAATCTTAATTTTAGTCAAACATTAATGTTTACACTTCAACAT
oDS101	N22 to N19b deletion rev	AGAGGATATCATTGCAAACGTCGGGCTTTCATGTTGAAGTGTAAACATTA
oDS102	N22 to N16c deletion fwd	TATTACTCACAGTTTGGCTCCGGTGTAAAACAAAATGTCTACTTCAACAT
oDS103	N22 to N16c deletion rev	AGAGGATATCATTGCAAACGTCGGGCTTTCATGTTGAAGTAGACATTTTG
oDS104	N22 to N13c deletion fwd	TTTTATGTTTCAAAACATTAATGATGTCTGGGTTTTGTTTACTTCAACAT
oDS105	N22 to N13c deletion rev	AGAGGATATCATTGCAAACGTCGGGCTTTCATGTTGAAGTAAACAAAACC
Mutate Replisome Components
oDS654	DPB3 sgRNA	AAACCTTGATCGCTCCGACCCGGTAA
oDS669	DPB3 deletion fwd	CAGATAAAAACAAGCAAGGGTCAACCGTGTTGCAAAAAAATGTTGTTGCT
oDS670	DPB3 deletion rev	TGCATCGAATAGTAATTACATAGCAATAATAGCAACAACATTTTTTTGCA
oDS747	MCM2 sgRNA	AAACCATAATCGTCATACATATTAAA
oDS748	mcm2-3A repair fwd	AACGAAGTAGATTTGATGGACGATAATATGGCTGACGATGCAGCAGCTGATCATAATAGA
oDS749	mcm2-3A repair rev	TTGTTCCCTGTCGTCAACTTGATCTGGATCAGCTCTATCTCTATTATGATCAGCTGCTGC
