# Supplementary figures and images for: Epigenetic memory independent of symmetric histone inheritance
Source: eLife journal article supplement (doi:10.7554/elife.51421), 2019-10-15

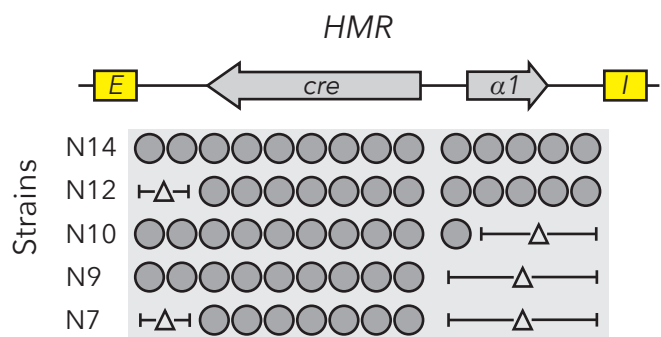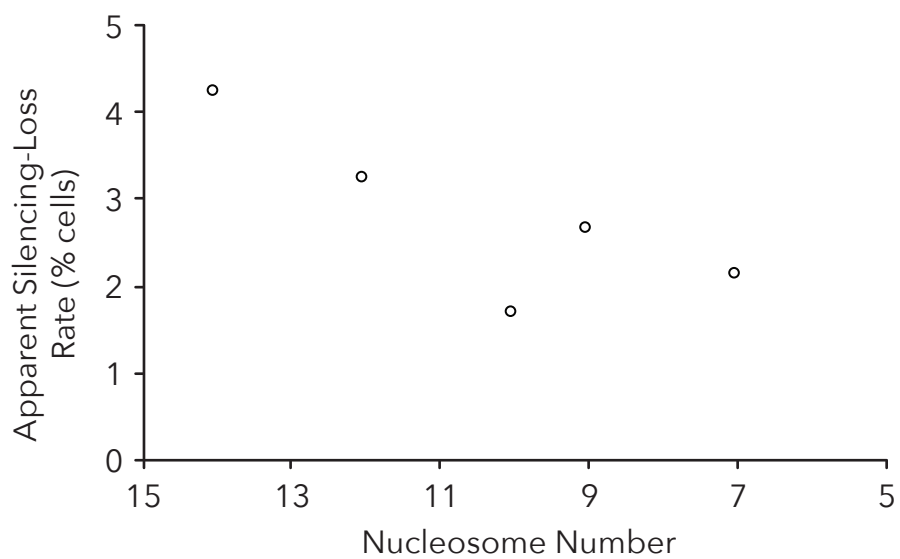

Supplement: supp [file elife-51421-supp-v1.zip]

*sir1*Δ

HMR

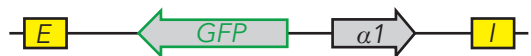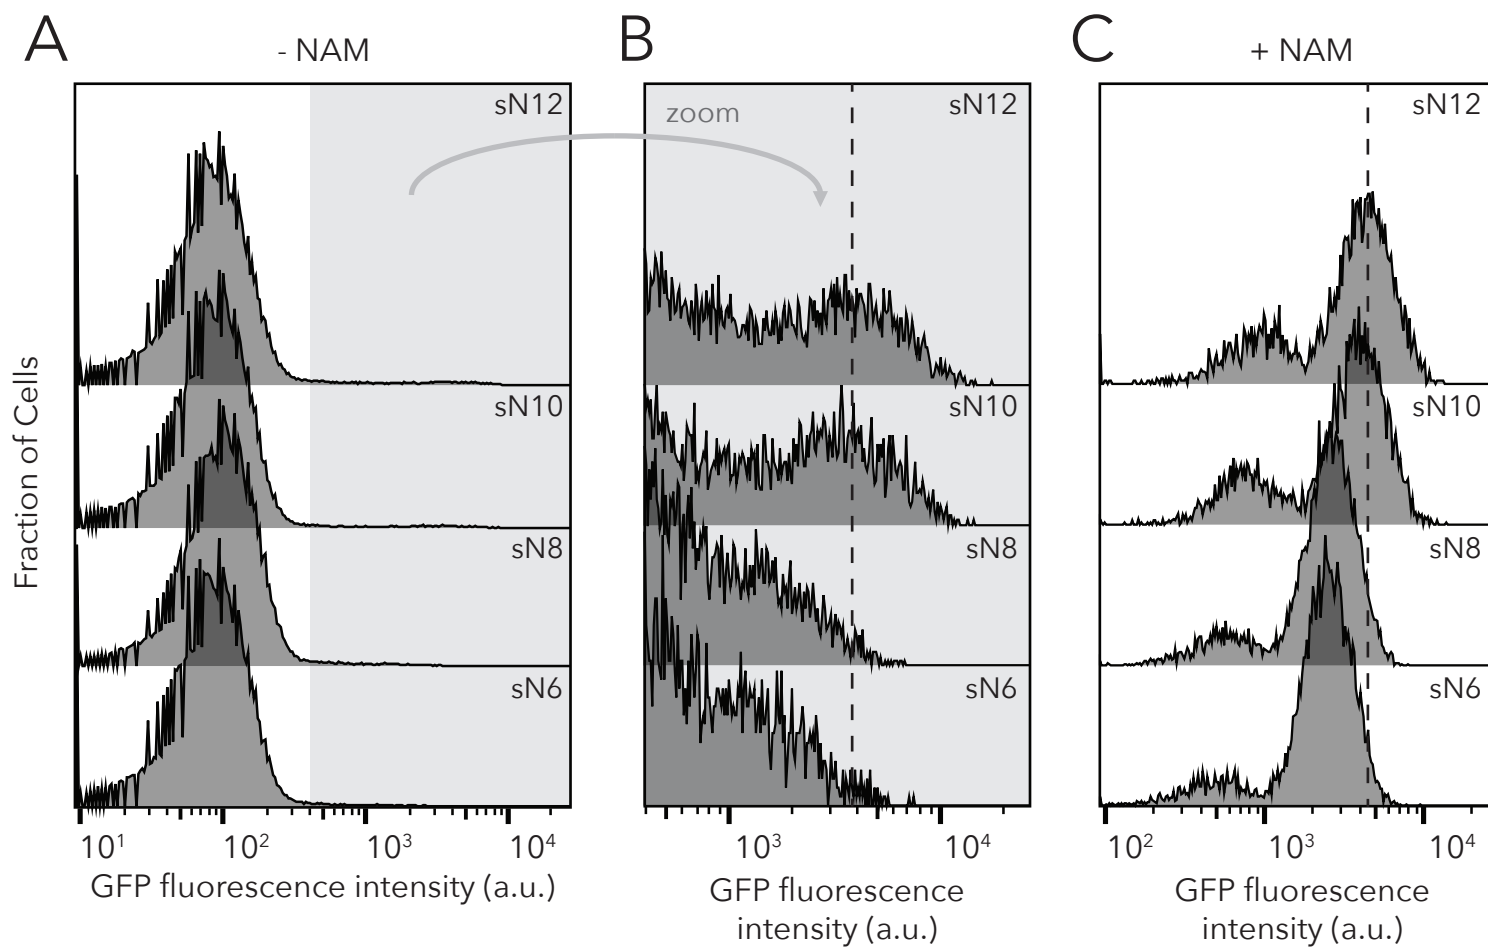

Supplement: supp [file elife-51421-supp-v1.zip]

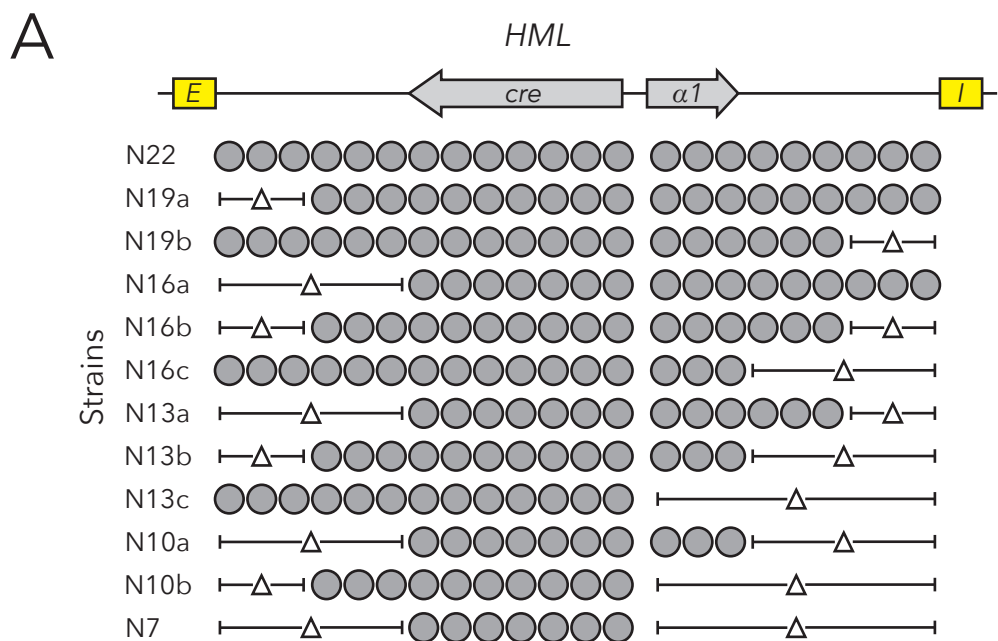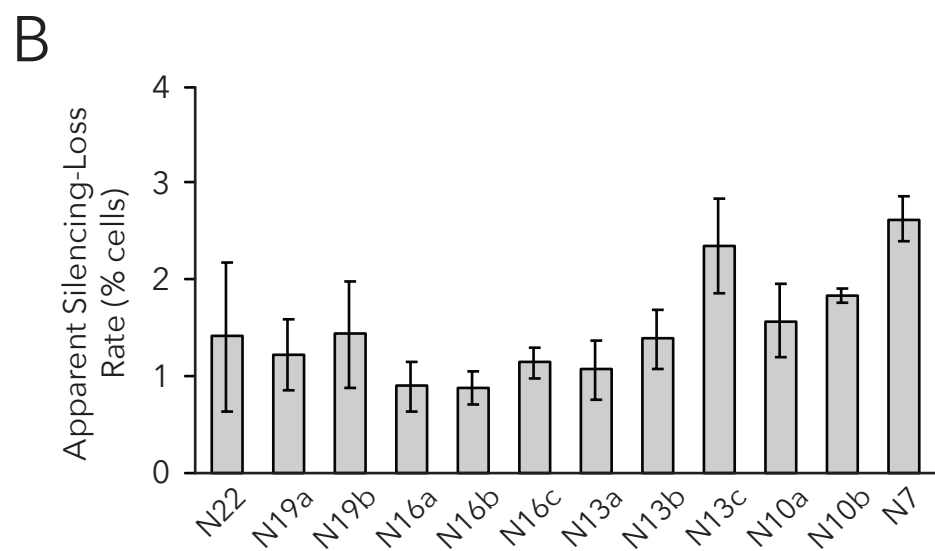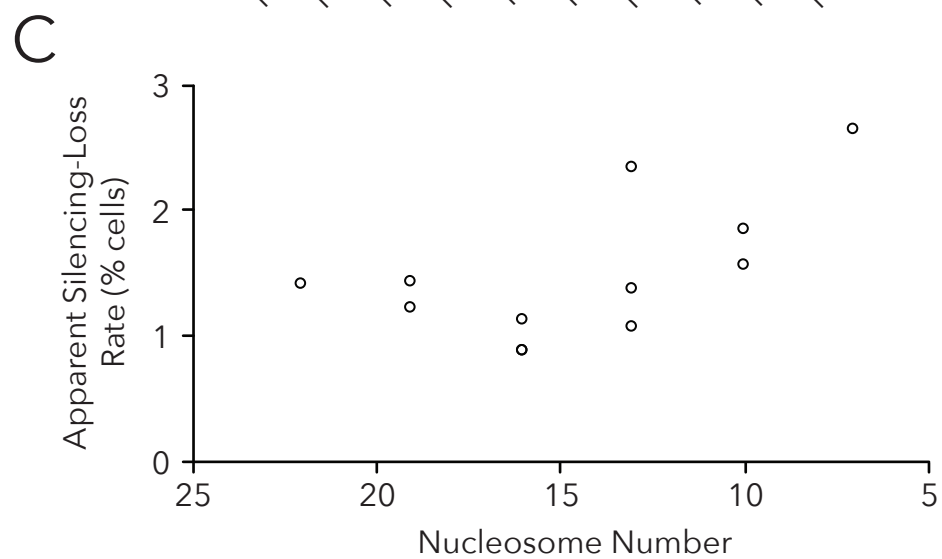

Supplement: supp [file elife-51421-supp-v1.zip]

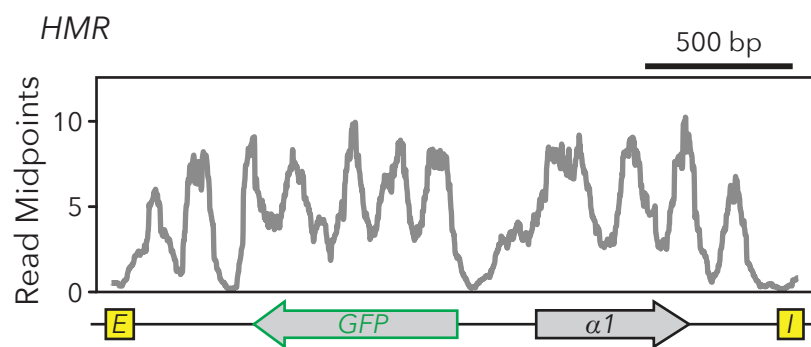

Supplement: supp [file elife-51421-supp-v1.zip]

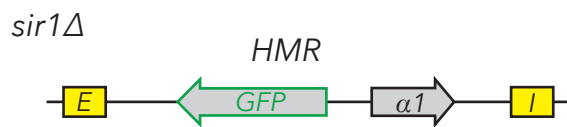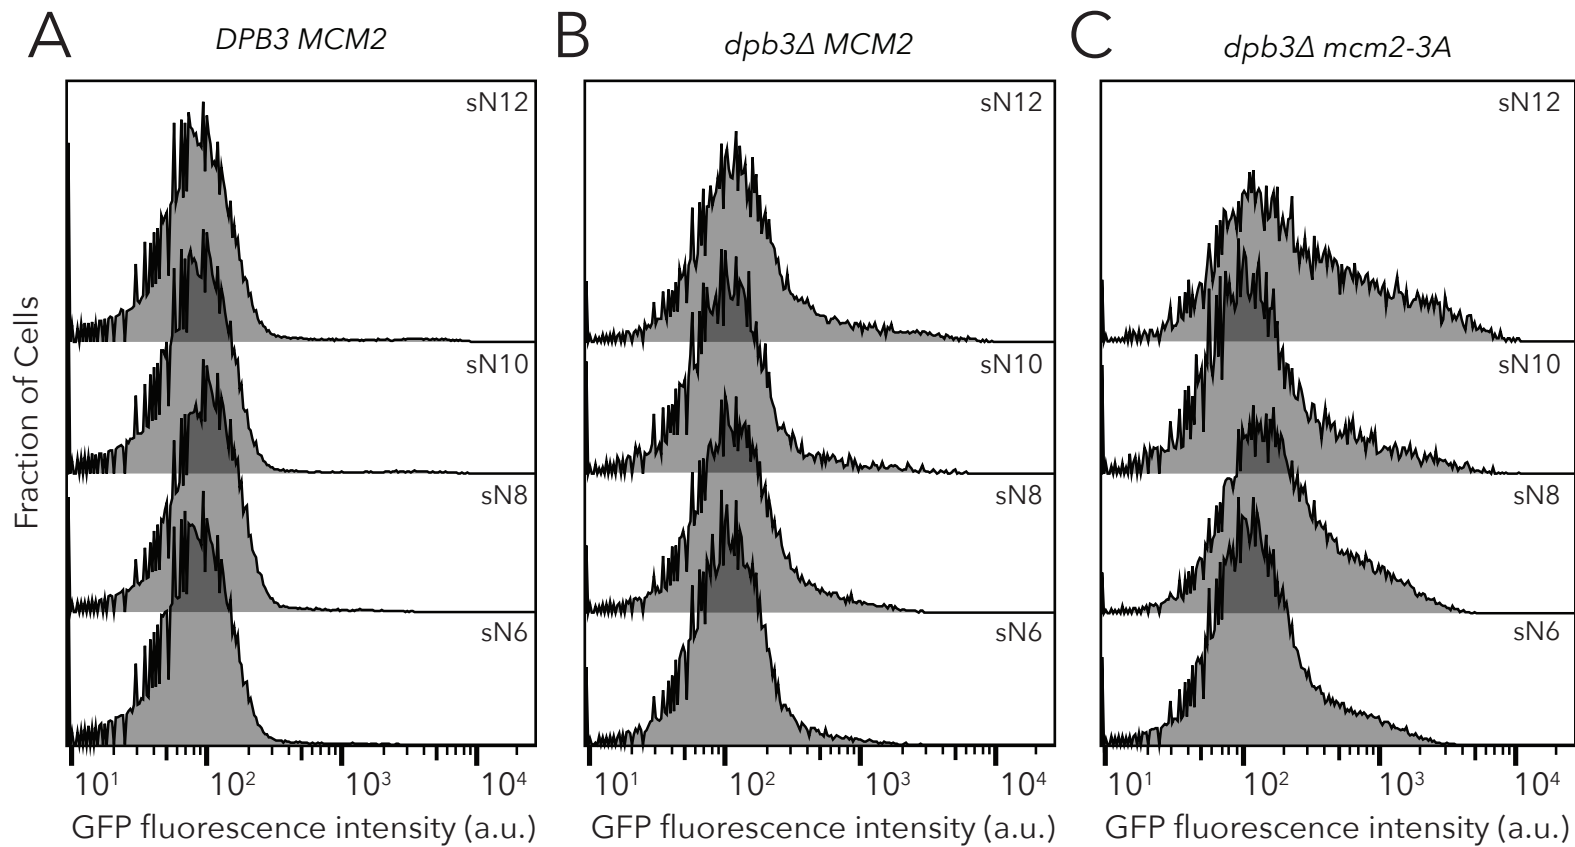

Supplement: supp [file elife-51421-supp-v1.zip]

A

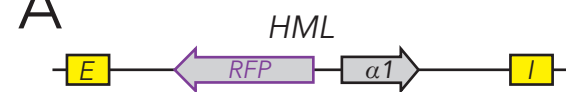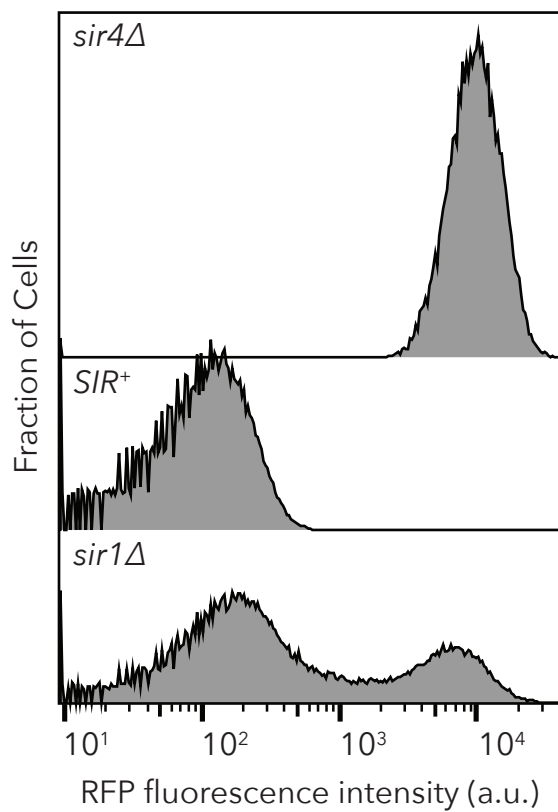

B

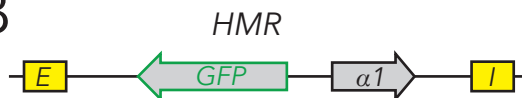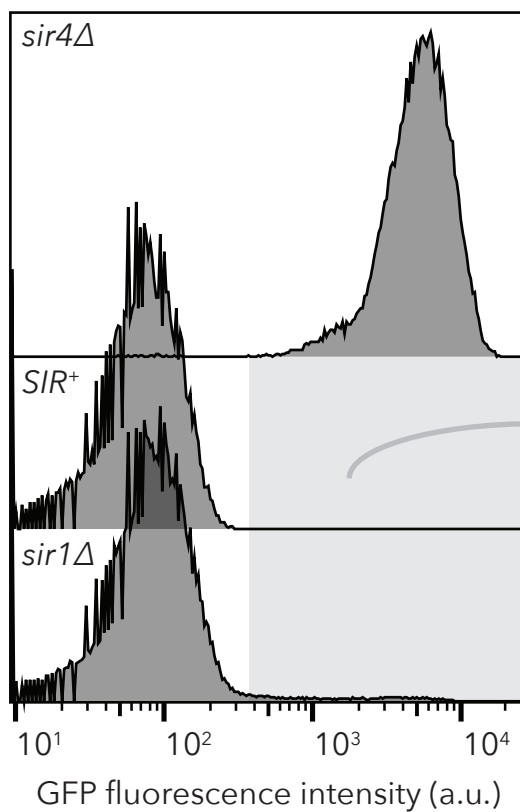

C

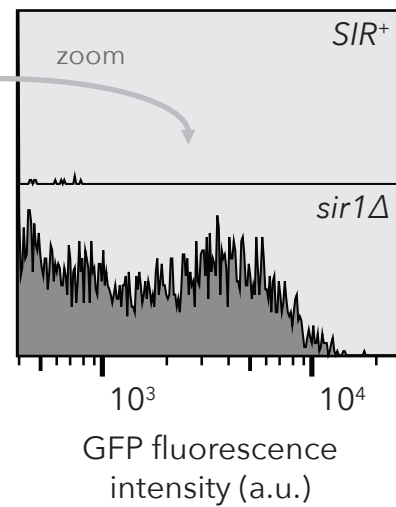

Supplement: supp [file elife-51421-supp-v1.zip]

HML

500 bp

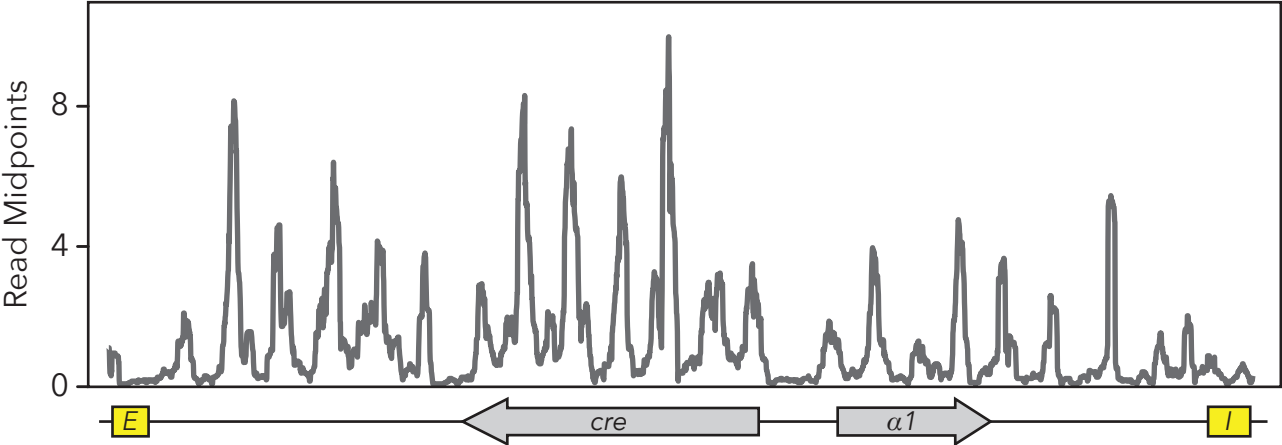

Supplement: supp [file elife-51421-supp-v1.zip]

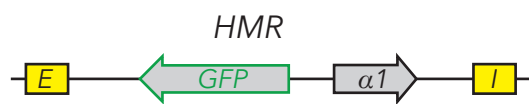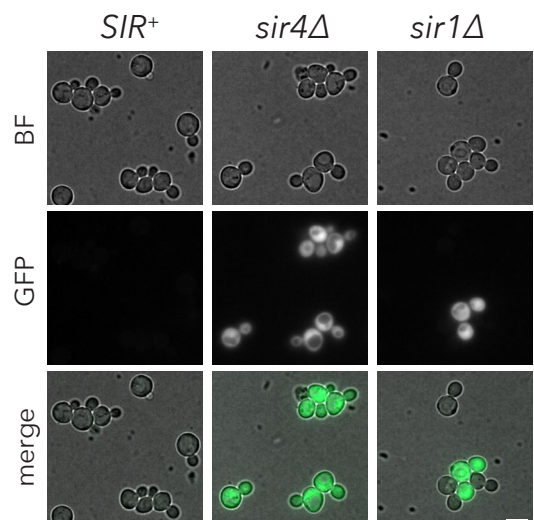

Supplement: supp [file elife-51421-supp-v1.zip]

*sir1Δ dpb3Δ mcm2-3A*

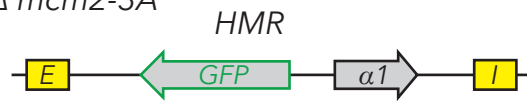

Sorted Silenced Cells

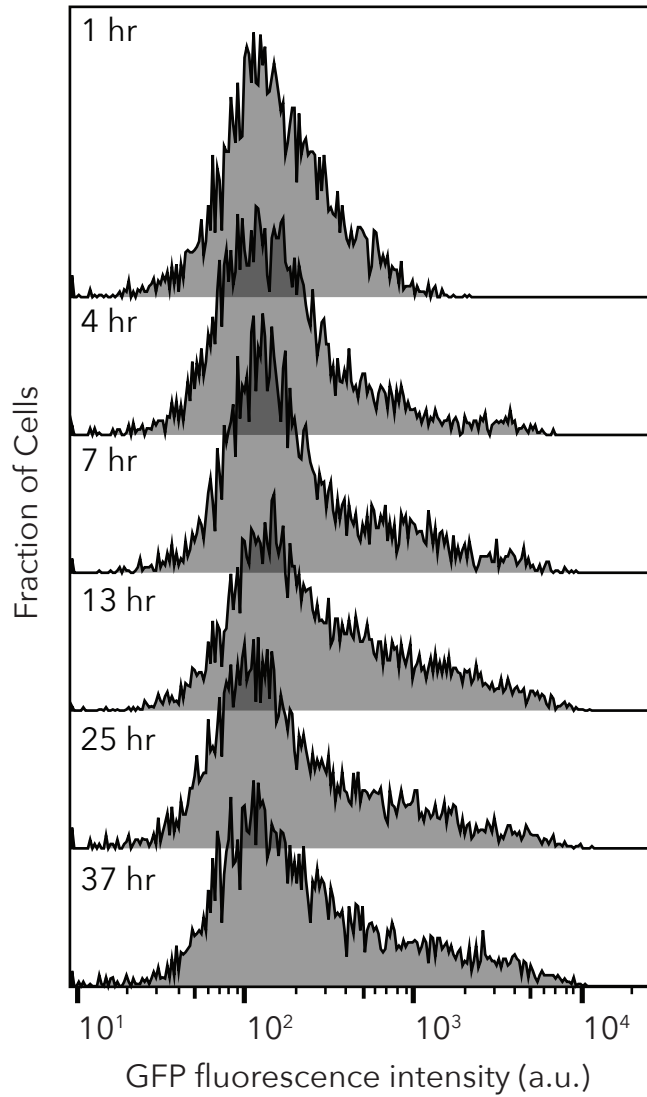

Sorted Unsilenced Cells

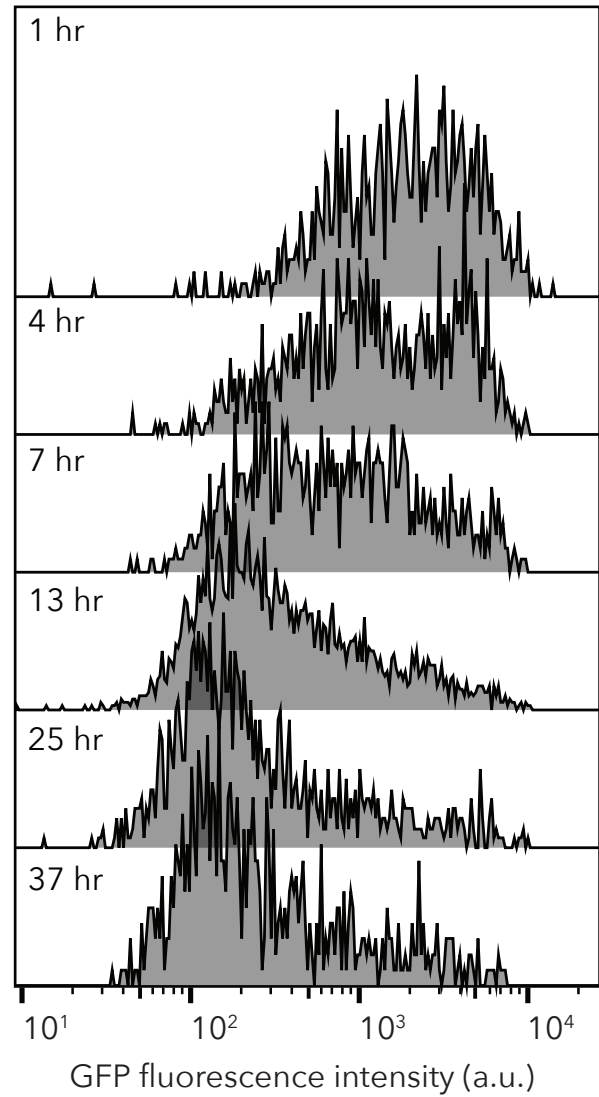

Supplement: supp [file elife-51421-supp-v1.zip]

*sir1*Δ

HMR

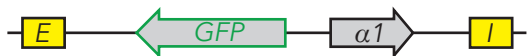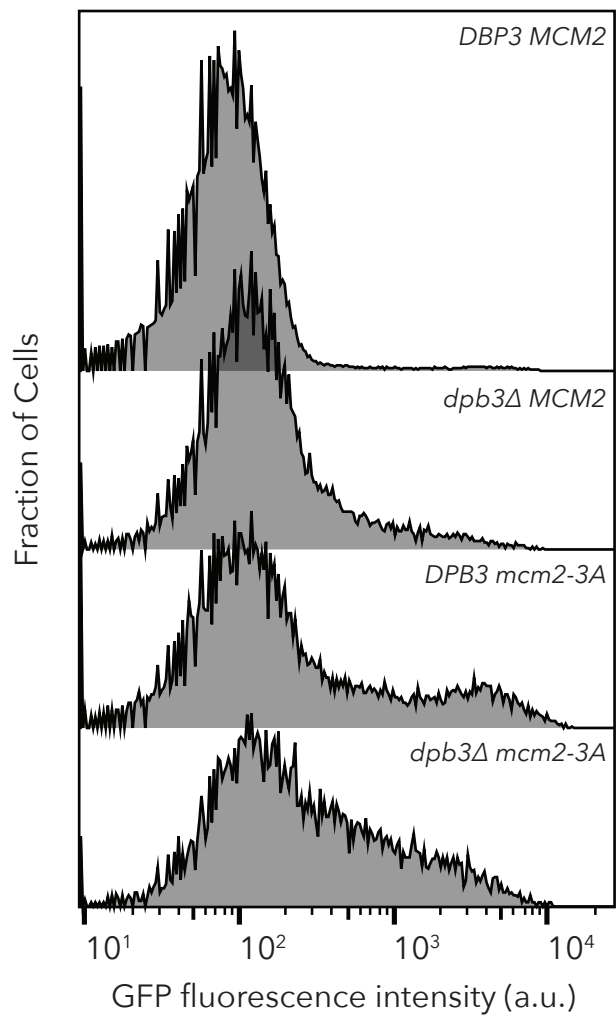

Supplement: supp [file elife-51421-supp-v1.zip]

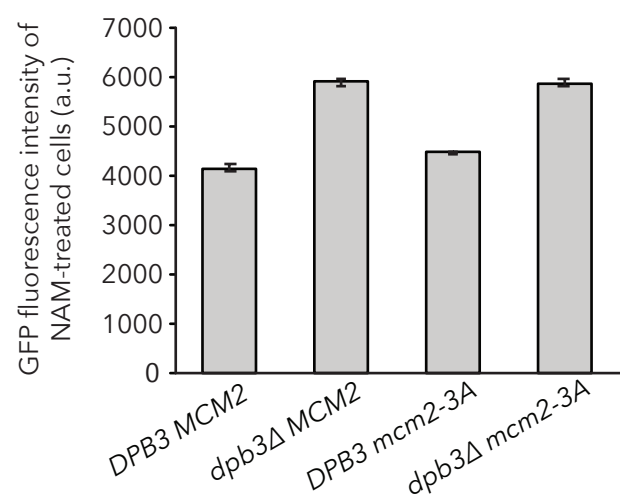

Supplement: supp [file elife-51421-supp-v1.zip]

# HMR

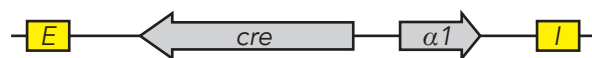

Strains

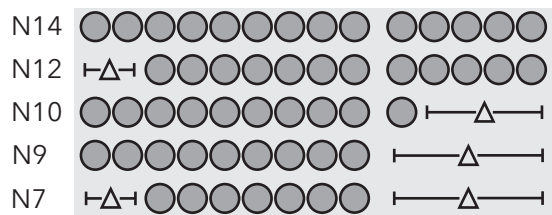

500 bp

Read Midpoints

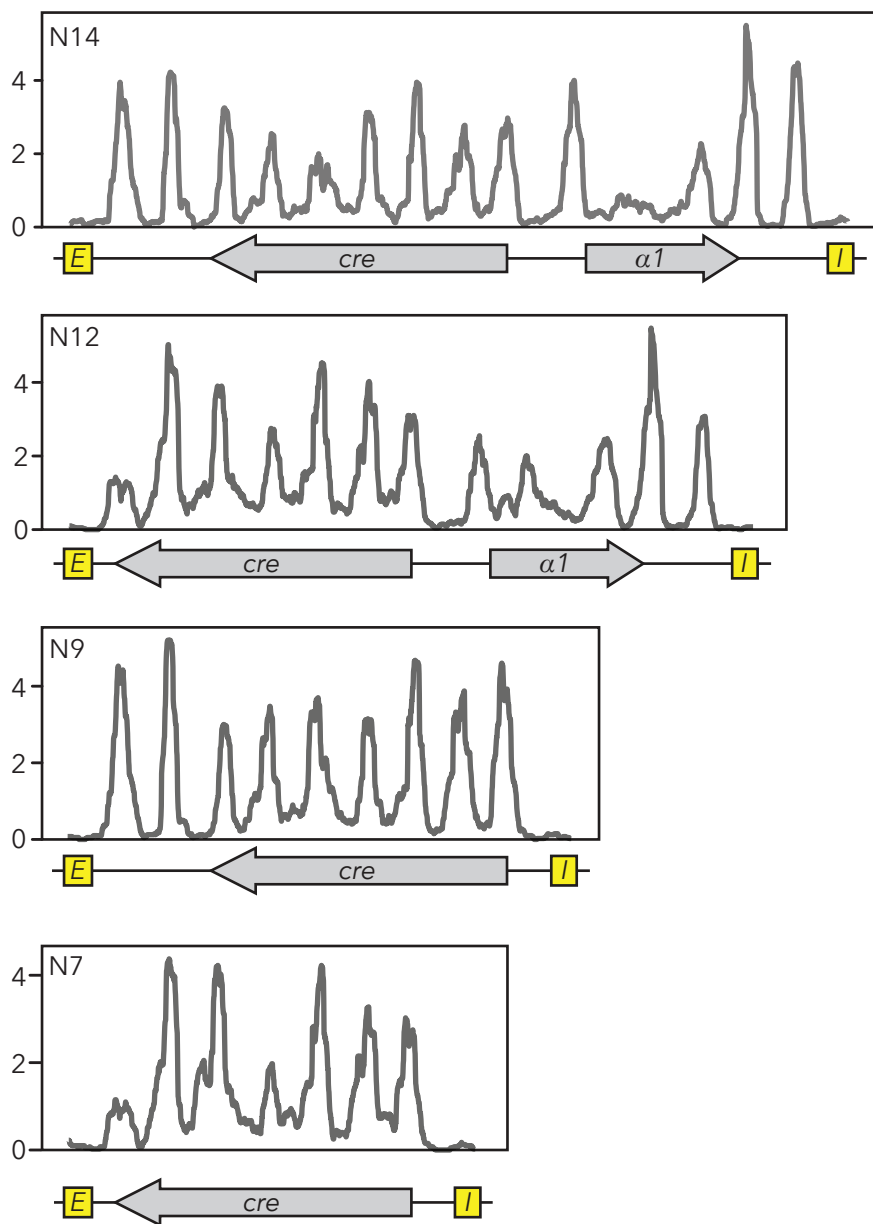

Supplement: supp [file elife-51421-supp-v1.zip]

HML

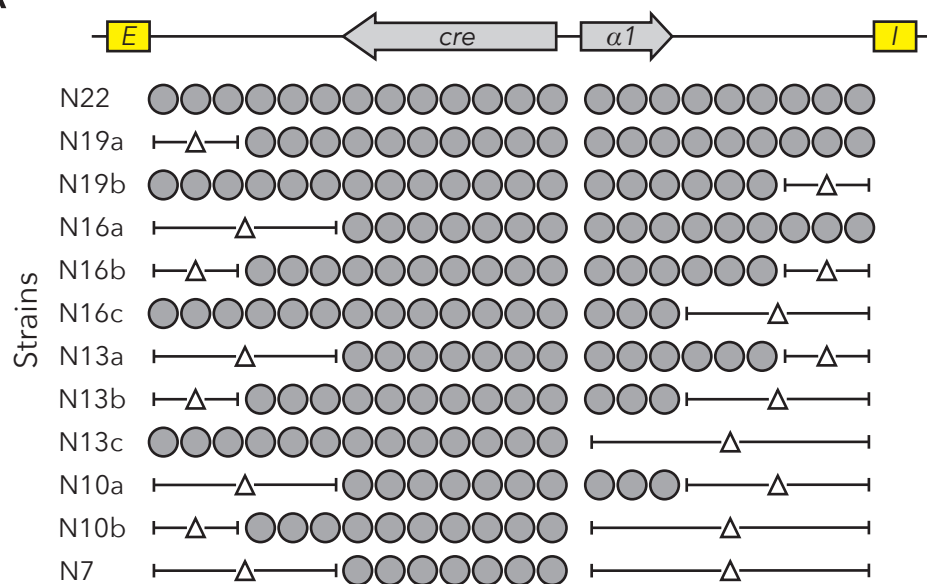

B

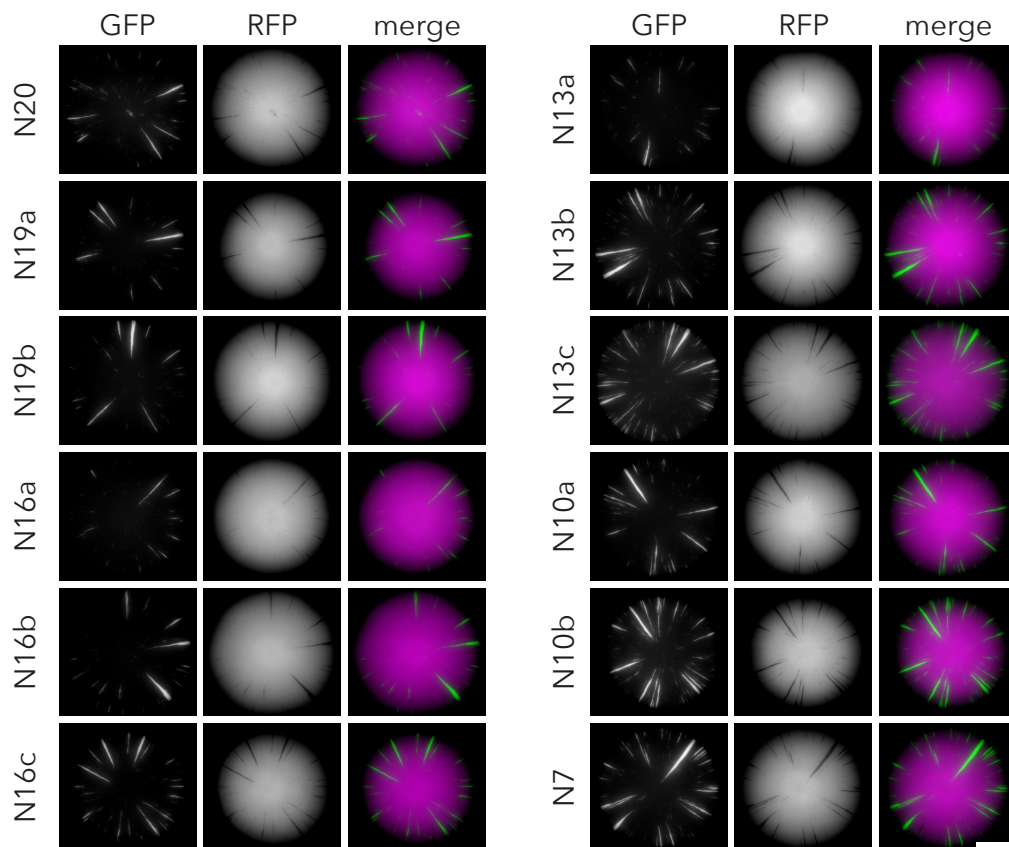

Supplement: supp [file elife-51421-supp-v1.zip]
